# Supplementary material
Source: Research Square preprint supplement (doi:10.21203/rs.3.rs-9579662/v1)
Supplement: Supplementary file 1 [file 435329eb86c451c16fd1dea2.docx]

**Appendix 1 – Semi-structured Interview Guide**

This semi-structured interview guide was designed to explore how residents experience and construct their professional identity throughout their internal medicine residency. Core questions were asked in all interviews. Additional prompts were used when relevant to deepen or clarify participants’ narratives (marked with an asterisk).

1. Personal Background and Educational Path

- Could you please introduce yourself?
- Where did you complete your undergraduate clinical training ?

2. Initial contact with Internal Medicine

- Why did you initially choose Internal Medicine?
- Did you complete a rotation in internal medicine before starting your residency?
- * Did you meet anyone who inspired you during that time?

3. Perceptions of Internal Medicine

- How did you experience your most recent rotation in an Internal Medicine department?
- Have your views of the specialty changed since the beginning of your training?
- * What were your first impressions—of the specialty, the teams, and the organisational structure?
- * How would you define an ‘internal medicine patient’ in your own words?
- * How would you define a ‘polypathological patient’?
- * What types of clinical situations do you think fall outside the scope of internal medicine?

4. Key Moments in Training

- Are there any moments that stand out as particularly significant during your residency?
- * Do you remember when was the moment that yourself or someone else identify you as an internist?

5. Reflections on Internal Medicine Residency

- What would an ideal internal medicine residency programme look like for you?
- * What would you change in the current training structure?

6. Final Reflections

- Is there anything else you would like to share about your experience or how you see your professional journey?
